# Supplementary material for: Catechol‐O‐Methyltransferase and Cardiovascular Disease: MESA
Source: PubMed Central journal article supplement — J Am Heart Assoc. 2019 Dec 16;8(24):e014986. doi: 10.1161/JAHA.119.014986 (PMC6951085; doi:10.1161/jaha.119.014986), 2019-12-16
Supplement: JAH3-8-e014986-s001.pdf [file JAH3-8-e014986-s001.pdf]

# **SUPPLEMENTAL MATERIAL**

**Table S1:** Power estimates of hazard ratios for incident CVD based on rs4680 G(val) allele frequencies over range of GAF from 0.3-0.6.

| <b>GAF</b> | <b>HR</b> | <b>Power</b> |
|------------|-----------|--------------|
| 0.30       | 0.70      | 0.98         |
|            | 0.75      | 0.91         |
|            | 0.80      | 0.74         |
| 0.40       | 0.70      | 0.99         |
|            | 0.75      | 0.95         |
|            | 0.80      | 0.80         |
| 0.50       | 0.70      | 0.99         |
|            | 0.75      | 0.96         |
|            | 0.80      | 0.83         |
| 0.60       | 0.70      | 0.99         |
|            | 0.75      | 0.96         |
|            | 0.80      | 0.82         |

Abbreviations: HR=Hazard Ratio; GAF= Gene allele frequency

**Table S2:** Demographics, baseline characteristics and aspirin use by *COMT* rs4818 genotype use in MESA.

|                                    | <b>CC</b>    | <b>GC</b>    | <b>GG</b>    |
|------------------------------------|--------------|--------------|--------------|
| <b>Participants, n</b>             | 2888 (47.7)  | 2515 (41.6)  | 649 (10.7)   |
| <b>Demographic data</b>            |              |              |              |
| Age                                | 62.1 (10.1)  | 62.3 (10.4)  | 63.0 (10.5)  |
| Female                             | 1501 (52.0)  | 1315 (52.3)  | 340 (52.4)   |
| Race/ethnicity                     |              |              |              |
| White                              | 828 (28.7)   | 1129 (44.9)  | 379 (58.4)   |
| Black                              | 981 (34.0)   | 528 (12.9)   | 72 (11.1)    |
| Hispanic                           | 733 (25.4)   | 533 (21.0)   | 110 (17.0)   |
| Asian                              | 346 (12.0)   | 325 (21.2)   | 88 (13.6)    |
| <b>Medical History</b>             |              |              |              |
| History of diabetes                | 395 (13.7)   | 312 (12.4)   | 54 (8.4)     |
| Current smoker                     | 373 (12.9)   | 338 (13.4)   | 66 (10.2)    |
| Aspirin Use at Exam 1 (%)          | 579 (20.1)   | 512 (20.4)   | 126 (19.4)   |
| <b>Physical Exam</b>               |              |              |              |
| Body mass index, kg/m <sup>2</sup> | 28.7 (5.7)   | 28.1 (5.4)   | 27.8 (5.1)   |
| Systolic blood pressure, mmHg      | 127.5 (21.7) | 126.0 (21.6) | 124.8 (20.7) |
| Diastolic blood pressure, mmHg     | 72.3 (10.4)  | 71.5 (10.3)  | 71.2 (9.7)   |
| <b>Laboratory Measurements</b>     |              |              |              |
| HDL cholesterol, mg/dL             | 50.6 (14.7)  | 50.8 (14.9)  | 51.0 (14.4)  |
| Triglycerides, mg/dL               | 131.3 (87.7) | 134.9 (96.9) | 133.9 (79.2) |
| Total cholesterol, mg/dL           | 193.5 (35.8) | 194.6 (36.6) | 195.2 (34.3) |

**Table S3:** Distribution of *COMT* rs4818 and rs4680 genotypes by race in MESA.

| Race            | rs4818 |      |      |         |       | rs4680 |      |      |         |        | LD r <sup>2</sup> |
|-----------------|--------|------|------|---------|-------|--------|------|------|---------|--------|-------------------|
|                 | GG     | GC   | CC   | MAF (G) | HWE   | AA     | AG   | GG   | MAF (A) | HWE    |                   |
| <b>Overall</b>  | 677    | 2635 | 3004 | 0.32    | <0.01 | 1106   | 2928 | 2316 | 0.40    | <0.001 | 0.31              |
| <b>White</b>    | 406    | 1206 | 869  | 0.41    | >0.05 | 655    | 1236 | 593  | 0.51    | >0.05  | 0.72              |
| <b>Black</b>    | 74     | 547  | 1018 | 0.21    | >0.05 | 178    | 685  | 806  | 0.31    | >0.05  | 0.12              |
| <b>Hispanic</b> | 109    | 555  | 764  | 0.27    | >0.05 | 211    | 704  | 514  | 0.39    | >0.05  | 0.24              |
| <b>Asian</b>    | 88     | 327  | 353  | 0.33    | >0.05 | 62     | 303  | 403  | 0.28    | >0.05  | 0.19              |

Abbreviations: MAF = minor allele frequency; HWE = Hardy-Weinberg Equilibrium; LD = Linkage disequilibrium

**Table S4:** Parameter estimates of COMT rs4818 and rs4680 (per G allele) association with baseline cardiometabolic risk factors.

| Risk Factor                   |        | All   |      |       | White |      |      | Black |      |      | Hispanic |      |      | Asian |      |       |
|-------------------------------|--------|-------|------|-------|-------|------|------|-------|------|------|----------|------|------|-------|------|-------|
|                               |        | Beta  | SE   | P     | Beta  | SE   | P    | Beta  | SE   | P    | Beta     | SE   | P    | Beta  | SE   | P     |
| <b>Fibrinogen, mg/dL</b>      | rs4818 | -3.65 | 1.35 | 0.007 | -0.81 | 2.11 | 0.70 | -2.29 | 3.03 | 0.45 | -4.94    | 3.02 | 0.10 | -9.70 | 3.06 | 0.002 |
|                               | rs4680 | 0.53  | 1.29 | 0.68  | 0.84  | 1.96 | 0.67 | 1.70  | 2.78 | 0.54 | -1.43    | 2.89 | 0.62 | 0.54  | 3.31 | 0.87  |
| <b>CRP, mg/L</b>              | rs4818 | -0.06 | 0.10 | 0.58  | 0.32  | 0.16 | 0.05 | -0.19 | 0.33 | 0.58 | -0.44    | 0.23 | 0.05 | -0.31 | 0.20 | 0.12  |
|                               | rs4680 | 0.17  | 0.11 | 0.11  | 0.33  | 0.15 | 0.03 | 0.09  | 0.27 | 0.74 | 0.003    | 0.22 | 0.99 | -0.01 | 0.27 | 0.97  |
| <b>ICAM, ng/mL</b>            | rs4818 | -1.05 | 2.22 | 0.64  | -2.86 | 2.93 | 0.33 | 10.52 | 7.85 | 0.18 | -3.22    | 5.84 | 0.58 | 1.09  | 4.95 | 0.82  |
|                               | rs4680 | -1.12 | 2.11 | 0.59  | -1.20 | 2.77 | 0.66 | 3.83  | 6.92 | 0.58 | -0.34    | 5.66 | 0.95 | -3.97 | 4.91 | 0.42  |
| <b>IL-6, pg/mL</b>            | rs4818 | -0.02 | 0.02 | 0.44  | 0.03  | 0.04 | 0.37 | -0.01 | 0.06 | 0.91 | -0.05    | 0.05 | 0.30 | -0.09 | 0.05 | 0.08  |
|                               | rs4680 | 0.02  | 0.04 | 0.50  | 0.02  | 0.03 | 0.47 | 0.03  | 0.05 | 0.59 | 0.10     | 0.04 | 0.02 | -0.10 | 0.06 | 0.13  |
| <b>SBP, mmHg</b>              | rs4818 | -0.23 | 0.39 | 0.56  | 0.13  | 0.56 | 0.81 | -0.12 | 0.93 | 0.90 | -0.49    | 0.83 | 0.55 | -1.28 | 1.08 | 0.24  |
|                               | rs4680 | 0.01  | 0.36 | 0.99  | 0.17  | 0.52 | 0.74 | 0.21  | 0.78 | 0.78 | -0.45    | 0.76 | 0.55 | -0.16 | 1.07 | 0.88  |
| <b>DBP, mmHg</b>              | rs4818 | 0.03  | 0.19 | 0.88  | 0.16  | 0.28 | 0.55 | 0.03  | 0.46 | 0.96 | -0.25    | 0.38 | 0.52 | 0.06  | 0.52 | 0.91  |
|                               | rs4680 | 0.03  | 0.18 | 0.85  | 0.09  | 0.26 | 0.74 | -0.03 | 0.37 | 0.94 | -0.30    | 0.36 | 0.41 | 0.71  | 0.56 | 0.21  |
| <b>Hemoglobin A1c, %</b>      | rs4818 | -0.02 | 0.02 | 0.22  | 0.00  | 0.02 | 0.95 | -0.07 | 0.05 | 0.15 | -0.05    | 0.06 | 0.34 | -0.07 | 0.04 | 0.12  |
|                               | rs4680 | -0.02 | 0.01 | 0.20  | -0.01 | 0.02 | 0.41 | -0.01 | 0.04 | 0.86 | -0.02    | 0.06 | 0.69 | -0.08 | 0.05 | 0.12  |
| <b>Fasting glucose, mg/dl</b> | rs4818 | -0.45 | 0.48 | 0.35  | 0.69  | 0.59 | 0.24 | -3.36 | 1.34 | 0.01 | -2.50    | 1.74 | 0.15 | -2.36 | 1.39 | 0.09  |
|                               | rs4680 | -1.15 | 0.96 | 0.23  | 0.44  | 0.52 | 0.40 | -1.69 | 1.21 | 0.16 | -0.86    | 1.64 | 0.60 | -3.86 | 1.65 | 0.02  |
| <b>Triglycerides, mg/dL</b>   | rs4818 | 0.17  | 1.66 | 0.92  | -1.57 | 4.38 | 0.72 | -0.12 | 4.71 | 0.98 | 0.60     | 2.56 | 0.81 | 0.51  | 3.00 | 0.86  |
|                               | rs4680 | -3.42 | 1.83 | 0.06  | 0.06  | 2.43 | 0.98 | -4.14 | 3.33 | 0.21 | -5.88    | 3.47 | 0.09 | -8.52 | 4.90 | 0.08  |
| <b>HDL-C, mg/dL</b>           | rs4818 | 0.03  | 0.26 | 0.89  | -0.05 | 0.41 | 0.90 | -0.07 | 0.64 | 0.91 | 0.42     | 0.51 | 0.42 | -0.22 | 0.62 | 0.72  |
|                               | rs4680 | 0.33  | 0.24 | 0.17  | -0.03 | 0.40 | 0.93 | 0.43  | 0.52 | 0.41 | 0.60     | 0.44 | 0.18 | 0.59  | 0.69 | 0.39  |
| <b>LDL-C, mg/dL</b>           | rs4818 | 0.08  | 0.63 | 0.90  | 0.75  | 0.92 | 0.42 | -0.69 | 1.53 | 0.65 | -0.79    | 1.37 | 0.56 | 0.10  | 1.55 | 0.95  |
|                               | rs4680 | -0.14 | 0.58 | 0.81  | 0.13  | 0.86 | 0.88 | -1.11 | 1.24 | 0.37 | -0.74    | 1.27 | 0.56 | 1.79  | 1.76 | 0.31  |

**Table S5:** *COMT* rs4818 and rs4680 gene dosage (per allele\*) association with rates of CVD stratified by race and sex.

| SNP             | Females        |          |                  | Males |          |                  |      |
|-----------------|----------------|----------|------------------|-------|----------|------------------|------|
|                 | Race/Ethnicity | Events/N | HR 95% CI        | P     | Events/N | HR, 95% CI       | P    |
| <b>rs4818</b>   |                |          |                  |       |          |                  |      |
| <b>Overall</b>  |                | 226/3271 | 0.93 [0.75-1.14] | 0.48  | 298/2977 | 0.80 [0.67-0.97] | 0.02 |
| <b>White</b>    |                | 97/1300  | 1.04 [0.77-1.41] | 0.80  | 117/1179 | 0.85 [0.65-1.11] | 0.24 |
| <b>Black</b>    |                | 55/846   | 0.77 [0.45-1.32] | 0.34  | 75/729   | 0.87 [0.58-1.32] | 0.52 |
| <b>Hispanic</b> |                | 54/736   | 0.75 [0.47-1.18] | 0.21  | 83/690   | 0.67 [0.46-0.98] | 0.04 |
| <b>Asian</b>    |                | 20/389   | 0.94 [0.50-1.79] | 0.86  | 23/379   | 0.83 [0.42-1.64] | 0.59 |
| <b>rs4680</b>   |                |          |                  |       |          |                  |      |
| <b>Overall</b>  |                | 226/3271 | 0.95 [0.78-1.15] | 0.59  | 298/2977 | 0.95 [0.79-1.14] | 0.59 |
| <b>White</b>    |                | 97/1300  | 1.14 [0.85-1.52] | 0.38  | 117/1179 | 0.95 [0.73-1.22] | 0.68 |
| <b>Black</b>    |                | 55/846   | 0.88 [0.61-1.29] | 0.52  | 75/729   | 1.04 [0.72-1.48] | 0.84 |
| <b>Hispanic</b> |                | 54/736   | 0.75 [0.51-1.11] | 0.15  | 83/690   | 1.04 [0.76-1.43] | 0.79 |
| <b>Asian</b>    |                | 20/389   | 0.89 [0.43-1.81] | 0.74  | 23/379   | 0.55 [0.30-1.03] | 0.06 |

Abbreviations: HR = Hazard ratio

\* Allele key: rs4818 coded allele = G; rs4680 coded allele = G

**Table S6:** Hormone replacement therapy (HRT) use among women assessed at Exam 1 and rates of CVD by *COMT* rs4818 and rs4680 genotype stratified by HRT use and race.

| Hormone replacement therapy (HRT) use ever |                 |             |                |                |                |                         |                         |                          |
|--------------------------------------------|-----------------|-------------|----------------|----------------|----------------|-------------------------|-------------------------|--------------------------|
| SNP                                        | Race/ethnicity  | Total (%)   | CC             | GC             | GG             | HRT ever – no*          | HRT ever – yes*         | P <sub>interaction</sub> |
| <b>rs4818</b>                              | <b>Overall</b>  | 1540 (51.1) | 708 (49.6)     | 647 (51.2)     | 185 (57.6)     | 1.22 [0.74-2.02], 0.44  | 0.64 [0.45-0.89], 0.009 | 0.047                    |
|                                            | <b>White</b>    | 772 (64.1)  | 269 (64.7)     | 367 (62.2)     | 136 (68.3)     | 2.20 [1.34-3.07], 0.002 | 0.59 [0.39-0.89], 0.01  | 0.02                     |
|                                            | <b>Black</b>    | 384 (47.4)  | 241 (48.5)     | 127 (45.0)     | 16 (50.0)      | 0.94 [0.49-1.78], 0.84  | 0.96 [0.41-2.30], 0.94  | 0.97                     |
|                                            | <b>Hispanic</b> | 268 (40.6)  | 144 (39.9)     | 107 (42.3)     | 17 (37.0)      | 0.83 [0.51-1.34], 0.44  | 0.62 [0.17-1.31], 0.46  | 0.39                     |
|                                            | <b>Asian</b>    | 116 (34.2)  | 54 (34.8)      | 46 (32.9)      | 16 (36.4)      | 1.28 [0.53-3.07], 0.58  | 0.59 [0.22-1.58], 0.30  | 0.84                     |
|                                            |                 |             | <b>met/met</b> | <b>val/met</b> | <b>val/val</b> |                         |                         |                          |
| <b>rs4680</b>                              | <b>Overall</b>  | 1701 (55.4) | 296 (57.7)     | 723 (51.8)     | 521 (47.1)     | 1.14 [0.66-1.95], 0.64  | 0.75 [0.56-1.02], 0.07  | 0.26                     |
|                                            | <b>White</b>    | 772 (64.1)  | 205 (66.8)     | 381 (63.0)     | 186 (62.5)     | 2.39 [1.42-4.01], 0.001 | 0.72 [0.49-1.04], 0.08  | 2E-04                    |
|                                            | <b>Black</b>    | 419 (50.9)  | 45 (50.6)      | 158 (47.9)     | 181 (46.2)     | 0.93 [0.57-1.53], 0.78  | 0.96 [0.47-1.95], 0.91  | 0.43                     |
|                                            | <b>Hispanic</b> | 302 (45.1)  | 39 (41.5)      | 138 (40.8)     | 91 (39.9)      | 0.83 [0.54-1.28], 0.40  | 0.59 [0.22-1.61], 0.31  | 0.26                     |
|                                            | <b>Asian</b>    | 137 (39.6)  | 7 (30.4)       | 46 (37.4)      | 63 (32.6)      | 0.81 [0.30-2.19], 0.68  | 0.88 [0.30-2.61], 0.82  | 0.24                     |

Random effects meta-analysis of HRT ever and never use.  $I^2$  for rs4818 HRT no = 65.1; HRT yes = 0.  $I^2$  for rs4680 HRT no = 72.7; HRT yes = 0

**Table S7:** Aspirin user (%) > 3 days/week by *COMT* rs4818 genotype at the five MESA exams.

| <b>Exam</b> | <b>rs4818 genotype</b> |            |            |
|-------------|------------------------|------------|------------|
|             | <b>CC</b>              | <b>GC</b>  | <b>GG</b>  |
| <b>1</b>    | 577 (20.0)             | 511 (20.3) | 125 (19.3) |
| <b>2</b>    | 863 (31.6)             | 762 (31.4) | 185 (29.2) |
| <b>3</b>    | 886 (33.9)             | 799 (34.6) | 195 (32.3) |
| <b>4</b>    | 944 (37.2)             | 824 (36.4) | 216 (36.0) |
| <b>5</b>    | 905 (45.2)             | 825 (44.4) | 215 (44.4) |



**Supplementary Table S8:** *COMT* rs4818 and rs4680 gene dosage (per allele\*) association with rates of CVD stratified by time-varying aspirin and HRT ever use among white women.

| SNP           | Aspirin                        | No HRT                  | Ever HRT                |
|---------------|--------------------------------|-------------------------|-------------------------|
|               |                                | HR [95% CI], P          | HR [95% CI], P          |
| <b>rs4818</b> | <3 days/week                   | 3.13 [1.53-6.39], 0.002 | 0.34 [0.16-0.69], 0.004 |
|               | ≥3 days/week                   | 1.99 [0.90-4.40], 0.09  | 0.80 [0.42-1.52], 0.49  |
|               | <b>P<sub>interaction</sub></b> | 0.39                    | 0.08                    |
| <b>rs4680</b> | <3 days/week                   | 3.02 [1.38-6.58], 0.006 | 0.46 [0.25-0.85], 0.01  |
|               | ≥3 days/week                   | 2.25 [0.97-5.24], 0.06  | 1.27 [0.69-2.35], 0.45  |
|               | <b>P<sub>interaction</sub></b> | 0.613                   | 0.02                    |

\* Allele key: rs4818 coded allele = G; rs4680 coded allele = G
